# Supplementary material for: Circulating Endothelial Progenitor Cells in Kidney Transplant Patients
Source: PLOS journal article supplement (doi:10.1371/journal.pone.0024046), 2011-09-08
Supplement: S3 (10.1371/journal.pone.0024046.s003) [file journal.pone.0024046.s003]

**Table S2.** Available studies on endothelial progenitor cells (EPCs) after kidney transplantation (RTx).

| Study                              | EPC identification marker                                                                             | RTx CNI-based | RTx CNI-free | Anti-hypertensive medication            | CKD | Controls | Main Results                                                                                                                                                                                                                                                                                                 |
|------------------------------------|-------------------------------------------------------------------------------------------------------|---------------|--------------|-----------------------------------------|-----|----------|--------------------------------------------------------------------------------------------------------------------------------------------------------------------------------------------------------------------------------------------------------------------------------------------------------------|
| <b>de Groot et al. 2005 [10]</b>   | CD34 <sup>+</sup>                                                                                     | 70            | 4            | in 70/74 patients                       | 29  | 74       | In renal transplant recipients EPC numbers were similar to those of healthy controls and significantly higher than in patients with advanced renal failure.                                                                                                                                                  |
| <b>Soler et al. 2005 [19]</b>      | CD34 <sup>+</sup> /CD133 <sup>+</sup> /CD45 <sup>+</sup>                                              | 94            | 0            | No information regarding the medication | 0   | 39       | Compared to controls the concentration of EPCs is reduced in renal transplant recipients, particularly in those patients with reduced GFR. EPCs show functional impairment after RTx.                                                                                                                        |
| <b>Herbrig et al. 2006 [18]</b>    | CD34 <sup>+</sup><br>CD34 <sup>+</sup> /CD133 <sup>+</sup><br>CD34 <sup>+</sup> /VEGF-R2 <sup>+</sup> | 20            | 0            | No information regarding the medication | 0   | 22       | The amount of CD34 <sup>+</sup> , CD34 <sup>+</sup> /CD133 <sup>+</sup> , CD34 <sup>+</sup> /VEGF-R2 <sup>+</sup> cells in the peripheral blood before and after transplantation did not differ. EPC functions improved after transplantation while there number decreased. SDF-1 level decreased after RTx. |
| <b>Steiner et al. 2006 [20]</b>    | CD34 <sup>+</sup> /KDR <sup>+</sup> /CD133 <sup>+</sup>                                               | 81            | 24           | in 91/105 patients                      | 0   | 37       | EPC did not differ between RTx and healthy individuals. Evidence for a negative association between EPCs and body mass index and blood pressure, whereas statin use was associated with greater EPC counts in stable RTx.                                                                                    |
| <b>Metsuyanin et al. 2009 [29]</b> | VE-C, CD146, CD31, Tie-2, Flk1, CD133 mRNA                                                            | 8             | 0            | No information regarding the medication | 13  | 10       | EPC marker molecules were markedly reduced in ESRD children undergoing hemodialysis compared with control patients. In contrast, transplanted patients exhibited normal gene levels of EPC marker molecules whereas SDF-1 was significantly elevated                                                         |

Studies identified by Medline and Pubmed searches performed in April 2010. Key words: kidney transplantation and EPC. CKD, chronic kidney disease; CNI, calcineurin inhibitor.
