# Supplementary material for: Circulating Endothelial Progenitor Cells in Kidney Transplant Patients
Source: PLOS journal article supplement (doi:10.1371/journal.pone.0024046), 2011-09-08
Supplement: S4 (10.1371/journal.pone.0024046.s004) [file journal.pone.0024046.s004]

**Table S3.** Clinical characteristics of control and Kidney transplant patients related in Figure S1.

|                                          | <b>RTx cases</b><br><b>(n = 15)</b> | <b>RTx cases</b><br><b>(n = 14)</b> | <b>Controls</b><br><b>(n = 11)</b> |
|------------------------------------------|-------------------------------------|-------------------------------------|------------------------------------|
| <b>Immunosuppressive therapy regimen</b> | <b>CNI-based</b>                    | <b>CNI-free</b>                     |                                    |
| <b>Ages, years</b>                       | 50 ± 12                             | 57 ± 17                             | 41 ± 9                             |
| <b>Sex (M/F)</b>                         | 11/4                                | 10/4                                | 7/4                                |
| <b>Time from RTx, months</b>             | 84 (13 – 192)                       | 27 (10 – 102)                       | n.a.                               |
| <b>Enzymatic creatinine, mg/dl</b>       | 1.8 (1.4 – 2.1)                     | 1.5 (1.1 – 2.0)                     | 1.0 (0.8 – 1.0)                    |
| <b>eGFR, mg/min/1.73 m<sup>2</sup></b>   | 38 (34 – 50)                        | 47 (36 – 60)                        | < 60                               |

In cases of normal distribution: variables are presented as mean (±SD). In cases of skewed distribution: variables are presented as median (interquartile range). CNI, calcineurin inhibitor; eGFR, estimated glomerular filtration rate; RTx, Kidney transplantation. (n.a. = not applied).
